# Supplementary material
Source: publisher figshare collection journal article supplement (https://geolsoc.figshare.com/ndownloader/files/12799133)
Supplement: Supplementary file 1 [file 12799133]

## Sheet: Foglio1
Sample	CLQ-T1a*	CLQ-T1a*	CLQ-T1a*	CLQ-T9b*	CLQ-T9b*	CLQ-T9b*	CLQ-T9b*	CLQ-T9b*	CLQ-T12	CLQ-T12	CLQ-T12	CLQ-T12	CLQ-T12	CLQ-T12	CLQ-T12	CLQ-T12	CLQ-T12	CLQ-T12	CLQ-T13b*	CLQ-T13b*	CLQ-T13b*	CLQ-T13b*	CLQ-T13b*	CLQ-T13b*	CLQ-T13b*	CLQ-T13b*	CLQ-T14	CLQ-T14	CLQ-T14	CLQ-T14	CLQ-T14	CLQ-T14	CLQ-T14	CLQ-T14	CLQ-T14	CLQ-T14	CLQ-T15	CLQ-T15	CLQ-T15	CLQ-T15	CLQ-T15	CLQ-T15	CLQ-T15	CLQ-T15	CLQ-T15	CLQ-T15	CLQ-T16	CLQ-T16	CLQ-T16
Locality	Cerro los Quesos			Cerro los Quesos					Cerro los Quesos										Cerro los Quesos								Cerro los Quesos										Cerro los Quesos										Cerro los Quesos
Glass shards	v1	v2	v3	v1	v2	v3	v4	v5	v1	v2	v3	v4	v5	v6	v7	v8	v9	v10	v1	v2	v3	v4	v5	v6	v7	v8	v1	v2	v3	v4	v5	v6	v7	v8	v9	v10	v1	v2	v3	v4	v5	v6	v7	v8	v9	v10	v1	v2	v3
SiO2	76.87	76.54	76.44	76.65	76.78	77.19	75.08	77.35	58.78	61.44	61.5	62.66	60.99	61.42	61.53	61.63	61.53	62.41	74.62	75.65	75.09	74.62	75.31	75.02	74.36	74.87	64.35	64.18	63.46	64.05	63.62	63.99	63.59	63.85	64.23	63.95	70.24	70.11	70.16	69.38	70.25	69.47	70.11	72.51	70.61	69.88	63.12	64.28	61.39
TiO2	0.06	bd	0.05	0.09	0.26	0.31	0.47	0.21	0.9644	0.9376	0.9884	0.7667	1.1075	0.9678	0.9617	0.9249	0.9341	0.888	0.09	bd	0.18	bd	bd	bd	0.06	bd	0.4543	0.4584	0.3909	0.4814	0.4658	0.5177	0.4686	0.4295	0.4413	0.4846	0.0261	bd	0.058	0.0377	0.0347	0.0319	0.0724	0.0593	0.0607	0.0912	0.5066	0.5504	0.4461
Al2O3	13.51	13.68	13.62	13	12.8	12.71	14.65	13.11	13.83	14.43	14.26	14.4	14.43	14.4	14.44	14.53	14.53	14.64	14.37	14.44	14.6	14.69	14.73	14.53	14.64	14.75	14.88	14.96	15.01	14.84	14.84	14.83	14.85	14.62	14.83	14.4	13.19	13.05	13.03	12.8	12.96	12.84	12.92	13.29	13.08	13.14	14.74	14.7	15.49
FeOT	0.6	0.5	0.65	0.82	1.01	0.85	1.16	0.84	3.5	3.5	3.42	2.95	3.77	3.36	3.3	3.46	3.65	3.31	1.54	1.45	1.46	1.35	1.59	1.41	1.62	1.07	1.7	1.7	1.67	1.77	1.68	1.75	1.76	1.78	1.82	1.78	1.41	1.46	1.47	1.51	1.55	1.54	1.31	1.48	1.6	1.52	2.16	1.95	1.94
MnO	0.14	0.12	bd	0.17	0.17	0.13	0.18	0.22	0.12	0.1356	0.1038	0.1047	0.1045	0.0829	0.0799	0.0929	0.1193	0.0465	bd	bd	0.16	bd	0.07	bd	bd	bd	0.0636	0.0843	0.0659	0.0797	0.0751	0.0874	0.105	0.105	0.056	0.0966	0.0408	0.05	0.0208	0.0531	0.0808	0.0123	0.0454	0.0423	0.0677	0.0346	0.0806	0.0852	0.1281
MgO	0.13	0.34	0.13	bd	0.19	0.14	0.09	0.12	1.1183	1.1129	0.8707	0.8344	1.1231	1.0901	1.0303	1.045	1.1022	1.0193	bd	bd	bd	bd	bd	bd	0.23	bd	0.4647	0.4323	0.4826	0.4596	0.4601	0.393	0.4682	0.4346	0.4504	0.4924	0.077	0.1028	0.1048	0.0754	0.0988	0.0901	0.0916	0.0753	0.108	0.1058	0.5654	0.4722	0.5028
CaO	0.93	0.95	0.86	0.63	0.46	0.6	0.95	0.56	2.55	2.52	2.34	1.96	2.72	2.4	2.41	2.51	2.49	2.2	0.51	0.38	0.47	0.49	0.63	0.51	0.5	0.69	1.1332	1.1517	1.1215	1.129	1.1032	1.1582	1.1	1.0244	1.0984	1.1407	0.6221	0.613	0.6077	0.5923	0.5631	0.5553	0.4687	0.5101	0.5834	0.6149	1.3665	1.1549	1.229
Na2O	2.89	2.99	2.83	2.84	2.69	2.57	2.08	2.78	4.01	4.18	2.41	4.21	2.69	4.55	3.04	3.55	4.57	2.99	3	2.76	2.68	2.95	2.98	2.84	2.93	3.12	2.93	3.01	3.51	3.29	4.09	2.91	4.04	4.81	2.93	3.19	3.04	2.99	3.13	3.33	2.91	3.2	2.81	3.72	3.33	3.1	5.05	3.55	4.19
K2O	4.77	4.81	5.35	5.57	5.41	5.36	5.17	4.67	3.96	3.98	4.09	4.5	3.87	4.12	3.88	4.19	3.97	4.06	5.67	5.18	5.26	5.6	4.4	5.5	5.51	5.18	4.48	3.86	4.97	4.77	4.93	4.46	5.1	4.78	3.58	4.8	4.73	4.82	4.74	4.54	4.22	4.49	4.49	4.4	4.79	4.55	4.14	4.87	4.79
P2O5	0.06	0.07	bd	bd	bd	bd	bd	bd	0.3031	0.297	0.1774	0.1648	0.196	0.2464	0.2345	0.2972	0.2401	0.1648	bd	bd	bd	0.13	0.15	0.06	bd	bd	0.0427	0.0336	0.086	0.0696	0.048	0.0664	0.0736	0.0443	0.078	0.0963	0.0749	0.1411	0.062	0.0455	0.0931	0.1043	0.0281	0.0635	0.0631	0.0649	0.1101	0.1021	0.0704
Tot.	100	100	100	100	100	100	100	100	89.1358	92.5331	90.1603	92.5506	91.0011	92.6372	90.9064	92.23	93.1357	91.7286	100	100	100	100	100	100	100	100	90.5981	90.1507	90.9418	91.425	91.5797	90.4285	91.7514	92.0237	89.7206	90.6891	93.5642	93.4945	93.486	92.5453	92.9355	92.4303	92.4566	96.2427	94.4793	93.2365	92.117	91.9019	90.4458
Table S2. EPMA and EDS analyses of glass of the P2 sequence samples. Oxides are shown as wt%.
EDS glass reference material are: CFA-47 glass standard and KE12 glass standard. Abbreviations: bd is below detection; na is not analysed.
* EDS analyses
[truncated: 293 more columns]
